# Supplementary material
Source: PubMed Central journal article supplement (PMC4096358)
Supplement: 13deebe60828a0088bedb1eaf96bdc4d_genetics.114.165225-4.pdf [file 13deebe60828a0088bedb1eaf96bdc4d_genetics.114.165225-4.pdf]

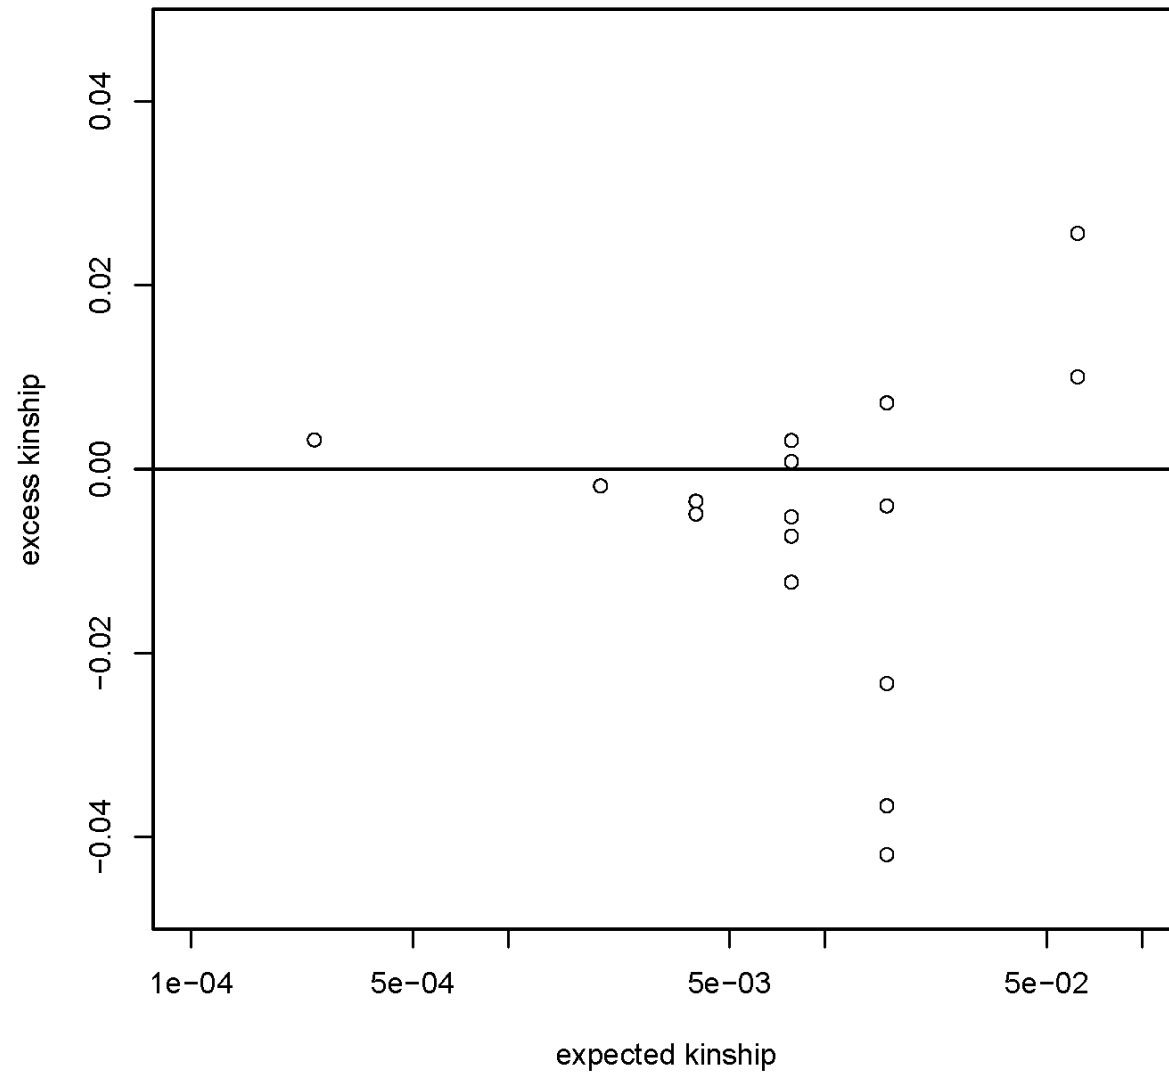

**Figure S2** Difference between the robust estimate of kinship coefficient based on genome-wide SNP genotypes and the expected kinship coefficient based on pedigree structure for the affected relative pairs from the Indian family.
