# Supplementary material
Source: PubMed Central journal article supplement (PMC4096358)
Supplement: 426f8a252a5b8640adc36cba430a5ed3_genetics.114.165225-6.pdf [file 426f8a252a5b8640adc36cba430a5ed3_genetics.114.165225-6.pdf]

# A) Family 15157- CDH1- chromosome 16, position 68857508

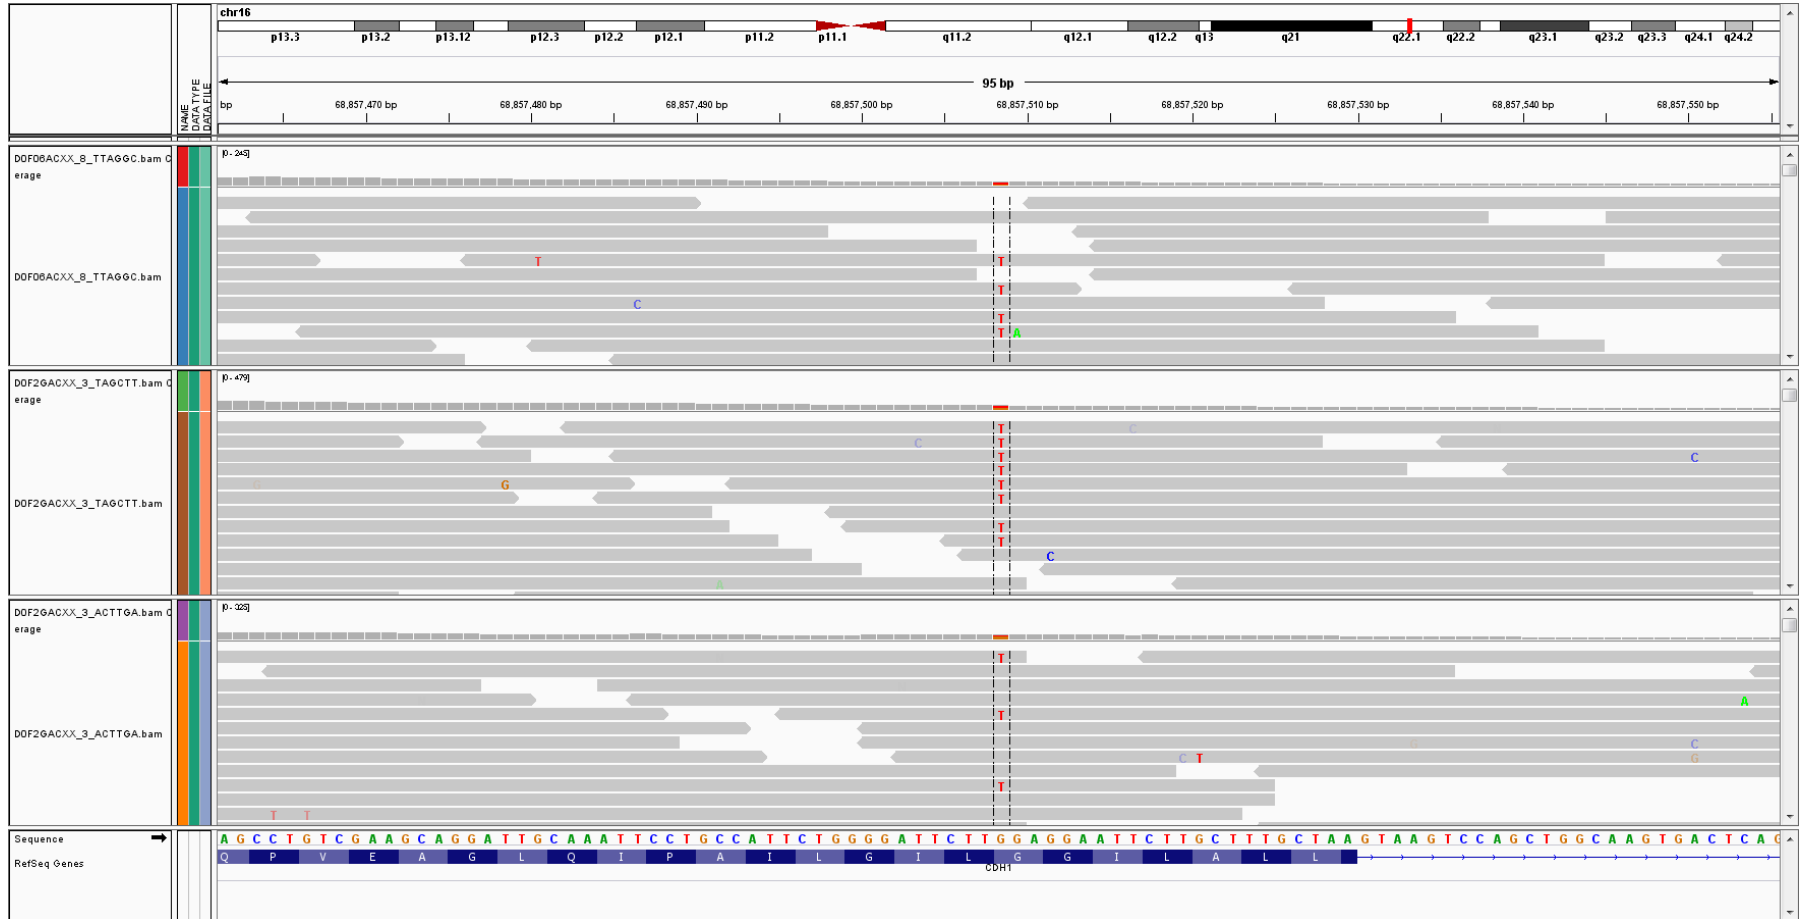

## B) Family 15160- FGFR4- chromosome 5, position 176524621

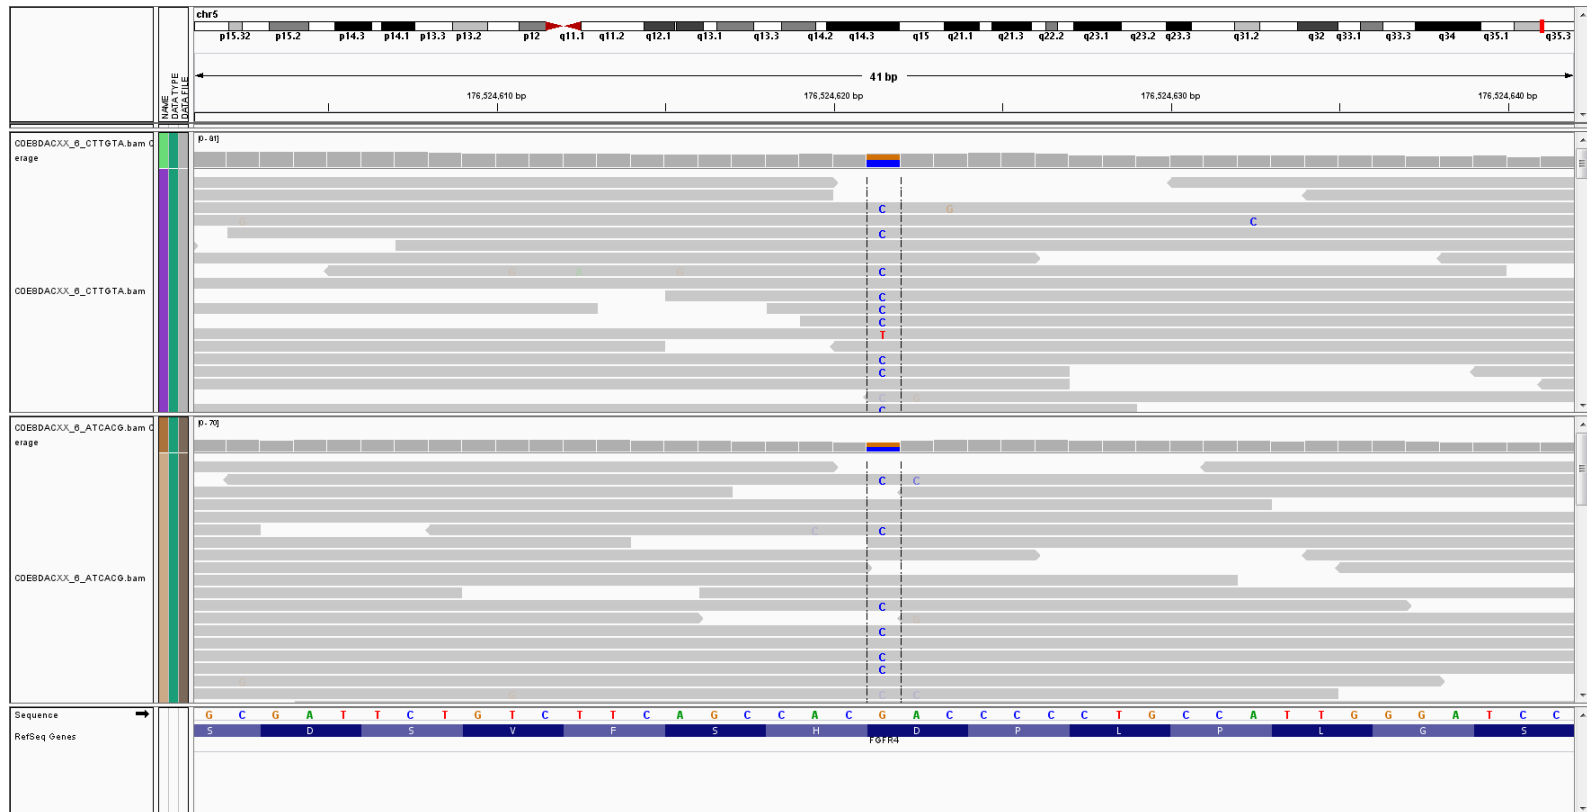

C) Family 17106 – TRPS1 - chromosome 8, position 116616313

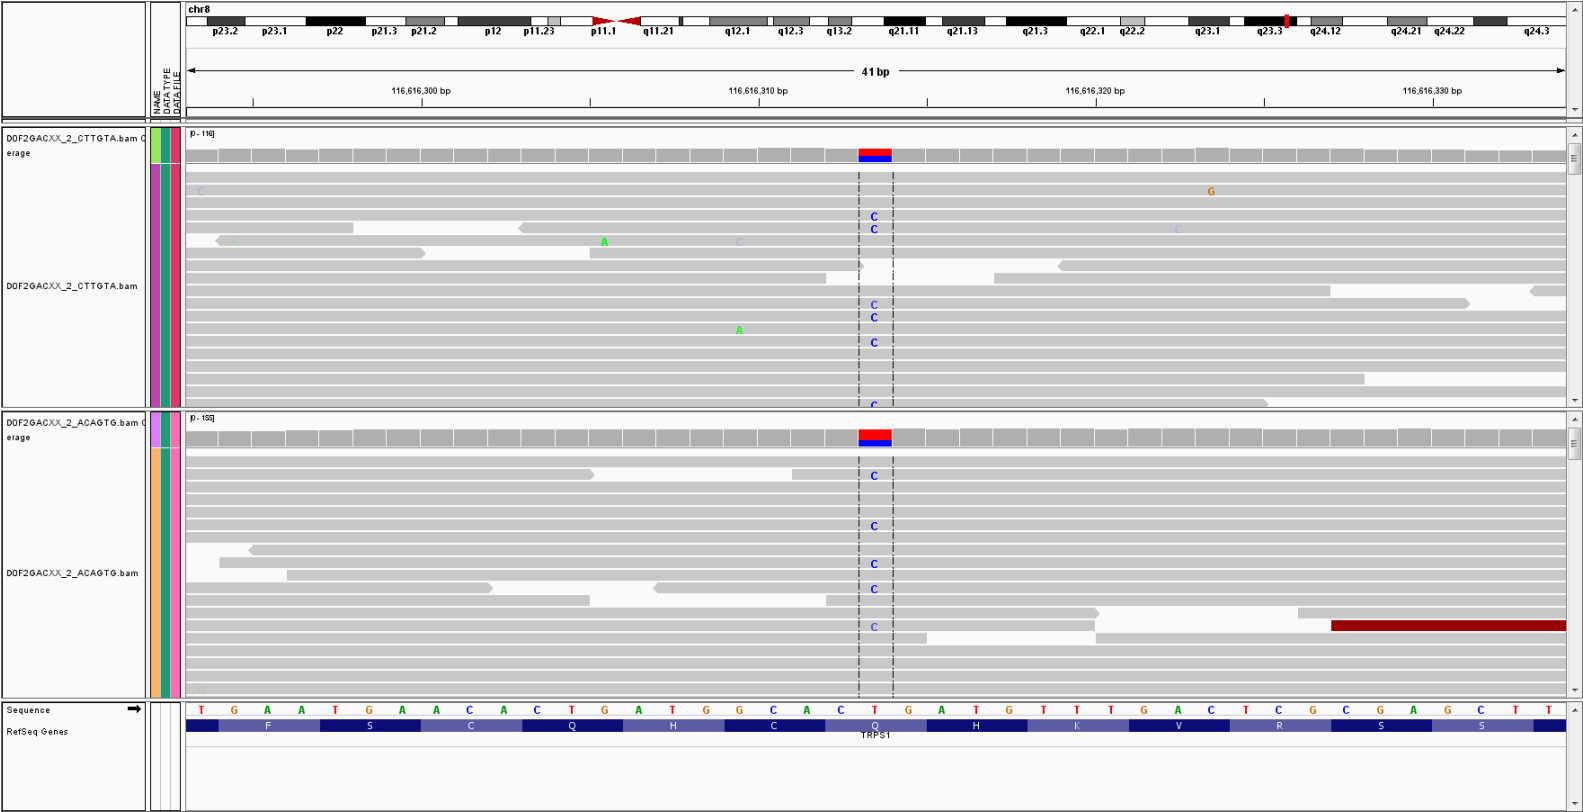

D) Family 25324 – FGF8 - chromosome 10, position 103531236

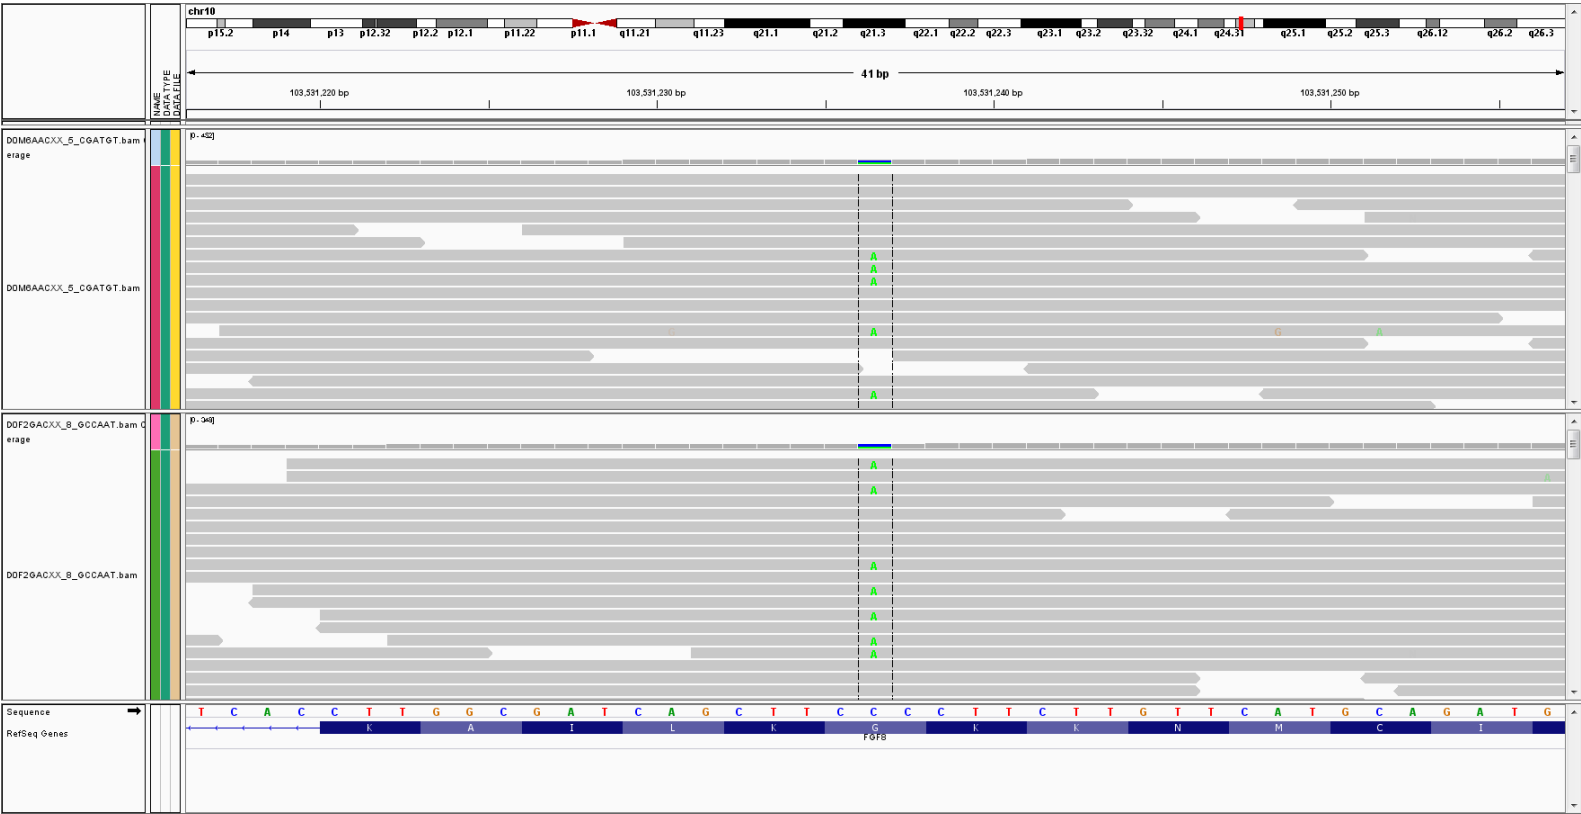

### E) Family 28010 – FTCD - chromosome 21, position 47572892

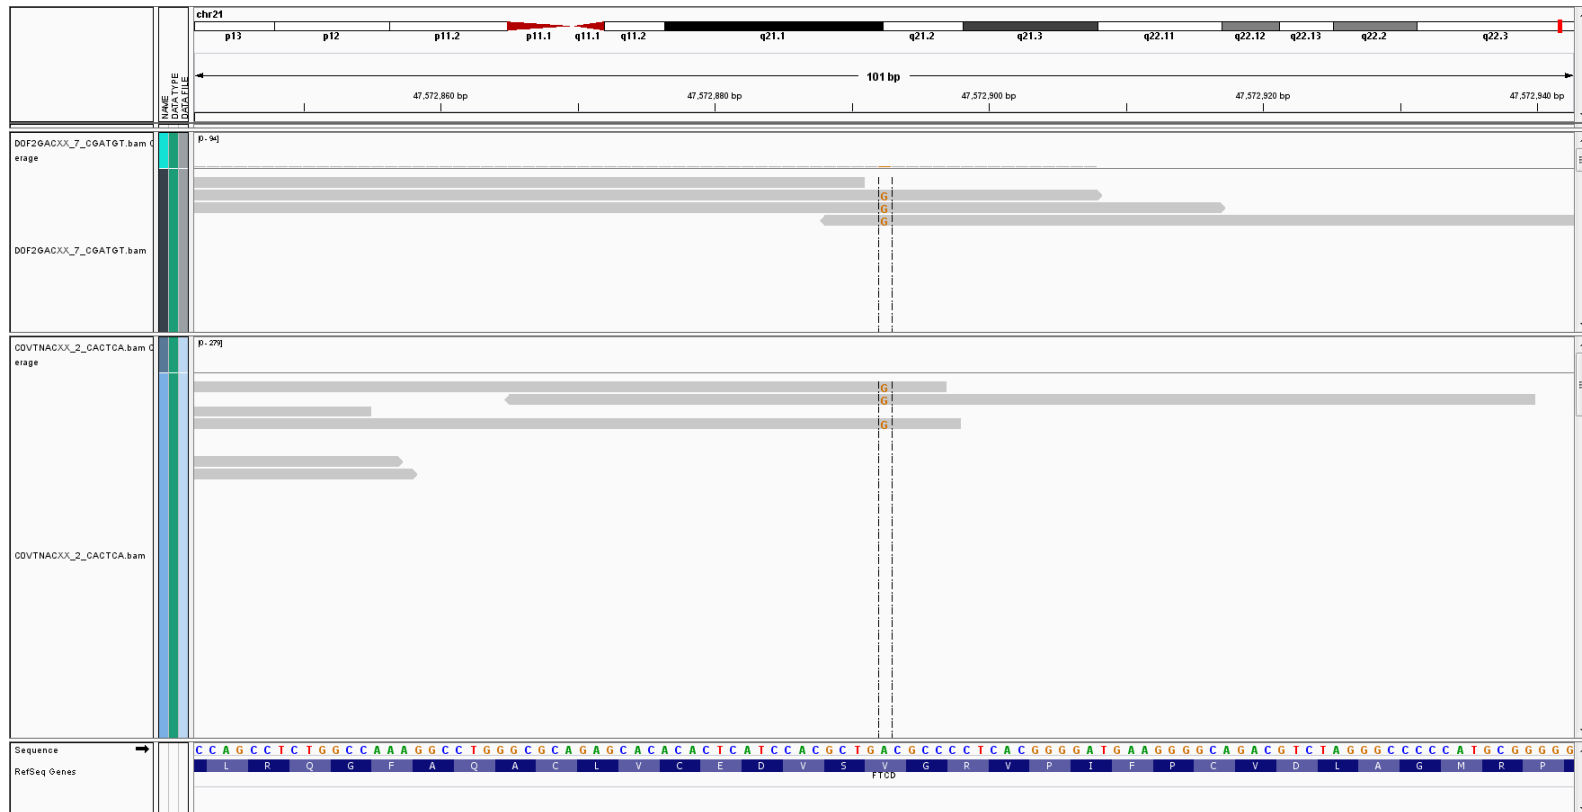

**Figure S1** Integrative Genomics Viewer display of the five novel SNVs predicted to be damaging shared by all sequenced affected relatives from the same family as listed in Table 2.
