# Supplementary material
Source: PubMed Central journal article supplement (PMC4096358)
Supplement: 633cd169ba28d6d8f0e7c23a4258958e_genetics.114.165225-3.pdf [file 633cd169ba28d6d8f0e7c23a4258958e_genetics.114.165225-3.pdf]

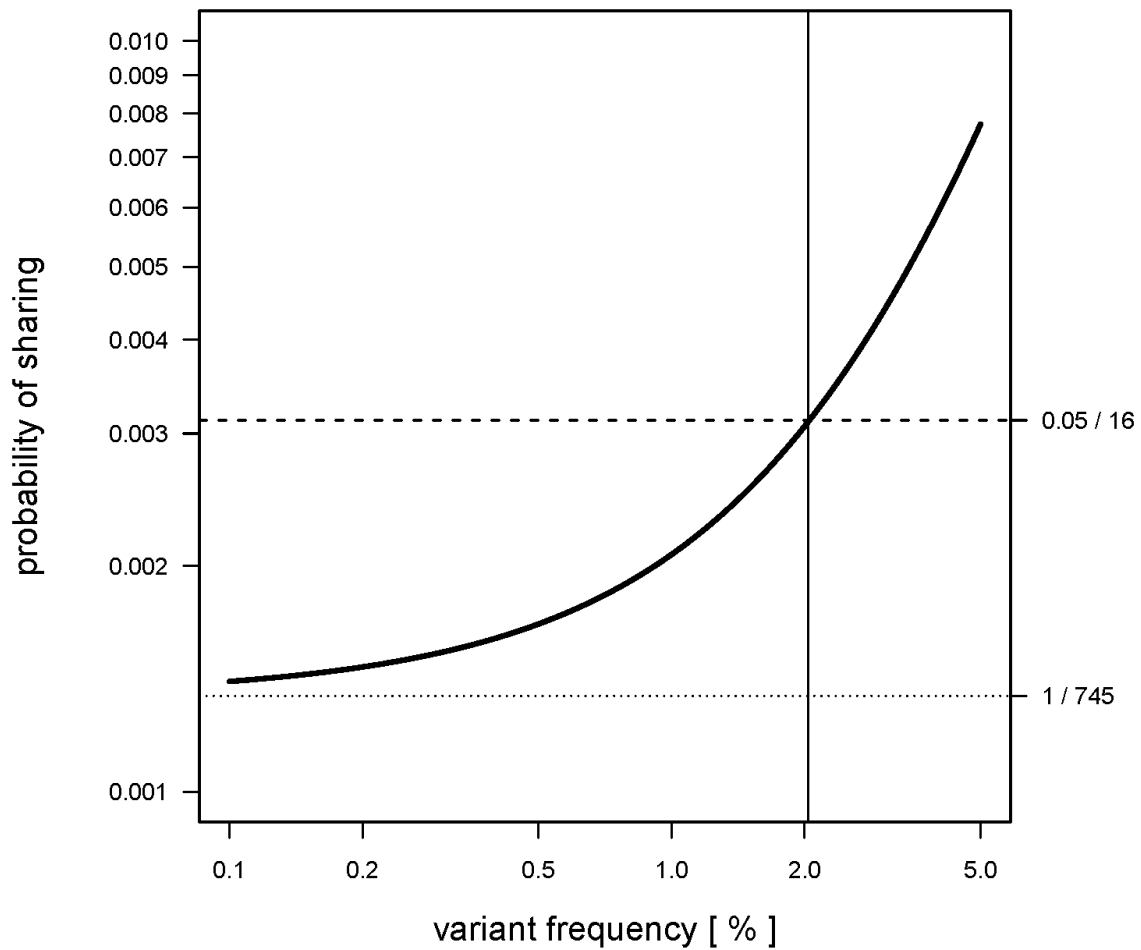

**Figure S3** P-value based on IBS sharing. Assuming unrelated founders and Hardy-Weinberg equilibrium, exact IBS sharing probabilities for pedigree members were derived using conditional probabilities under Mendel's laws as a function of variant allele frequency (x-axis). The sharing probabilities calculated under the assumption of no IBS without IBD is  $1/745 = 0.0013$ , indicated by the dotted horizontal line. The multiple comparison corrected significance threshold is  $0.05/16 = 0.0031$  indicated by the dashed horizontal line.
